# Supplementary material for: Optical costs and benefits of disorder in biological photonic crystals
Source: Royal Society of Chemistry journal article supplement (doi:10.1039/d0fd00101e), 2020-01-01
Supplement: d0fd00101e1.pdf [file d0fd00101e1.pdf]

## Faraday Discussions

### Electronic Supplementary Information (ESI)

#### **Optical Costs and Benefits of Disorder in Biological Photonic Crystals**

Sébastien R. Mouchet,<sup>a,b</sup> Stephen Luke,<sup>a</sup> Luke T. McDonald,<sup>†a</sup> and Pete Vukusic<sup>\*a</sup>

#### **Electronic supplementary information**

---

<sup>a</sup> School of Physics, University of Exeter, Physics Building, Stocker Road, EX4 4QL Exeter, UK

<sup>b</sup> Department of Physics and Namur Institute of Structured Matter (NISM), University of Namur, Rue de Bruxelles 61, 5000 Namur, Belgium.

<sup>†</sup> Now with School of BEES, Butler Building, Distillery Fields, North Mall, Cork, Ireland.

\* E-mail: P.Vukusic@exeter.ac.uk.

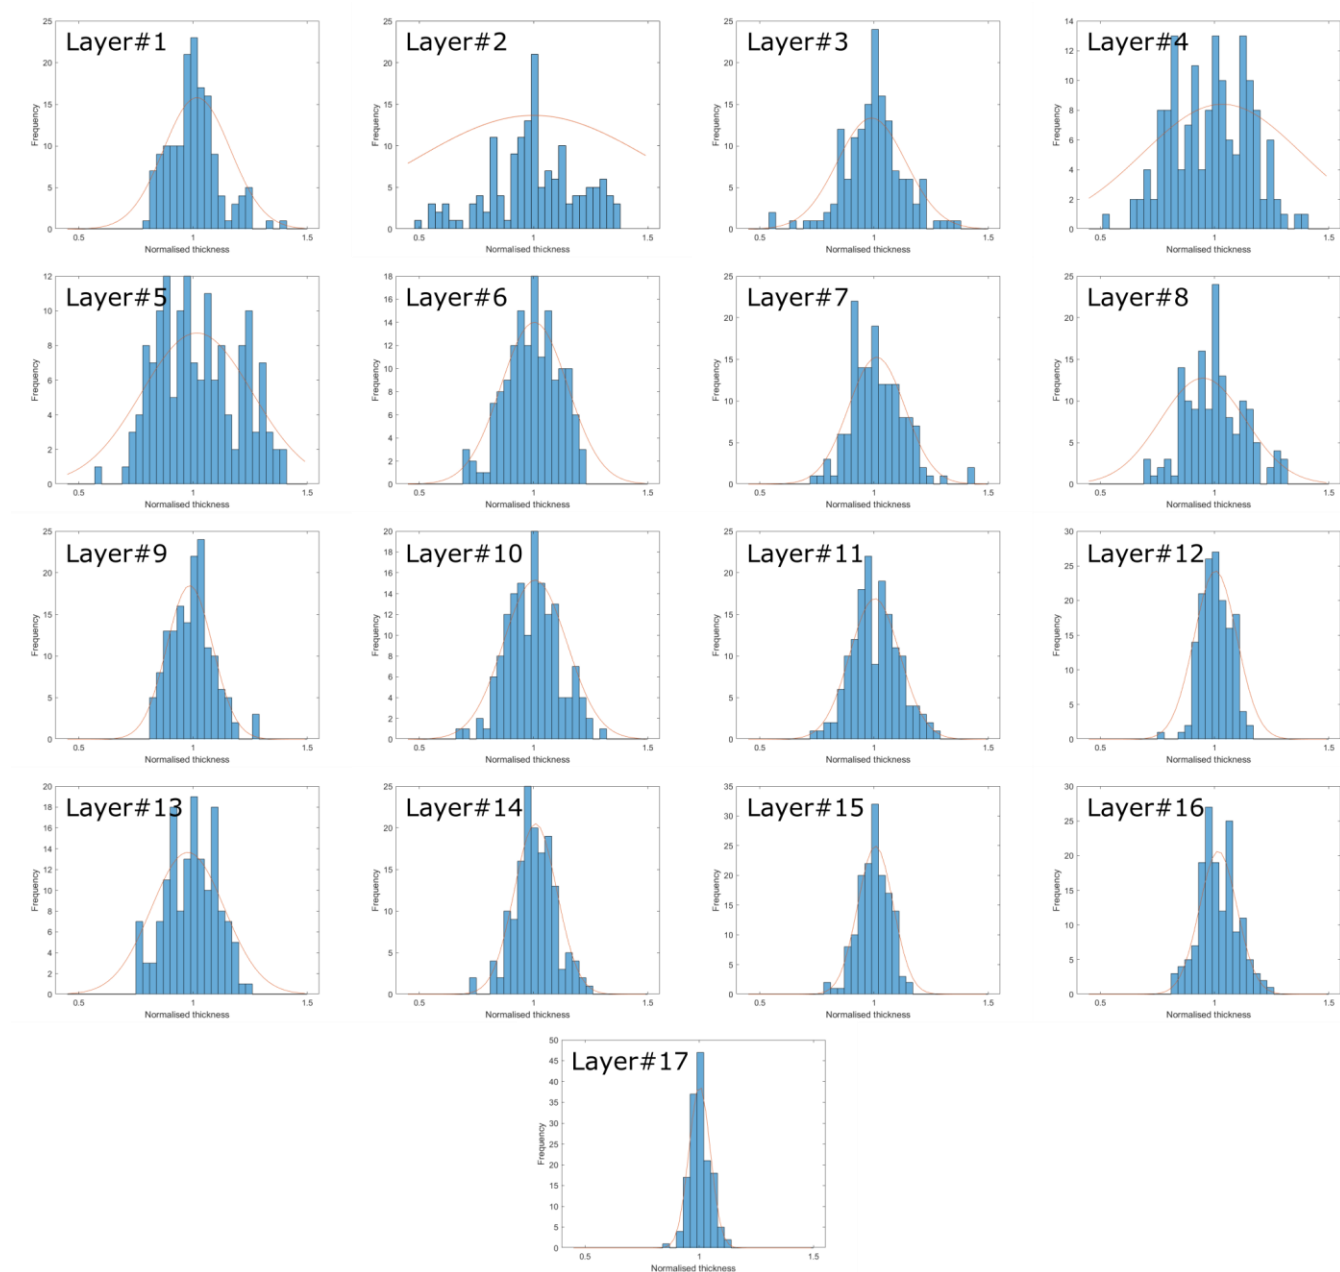

**Fig. S1** – Distributions of normalised thicknesses of each layer in the green region of the elytra of *C. rajah* ( $N = 152$ ) with Gaussian fits. Layer#1 corresponds to the top layer and #17 to the deepest layer.

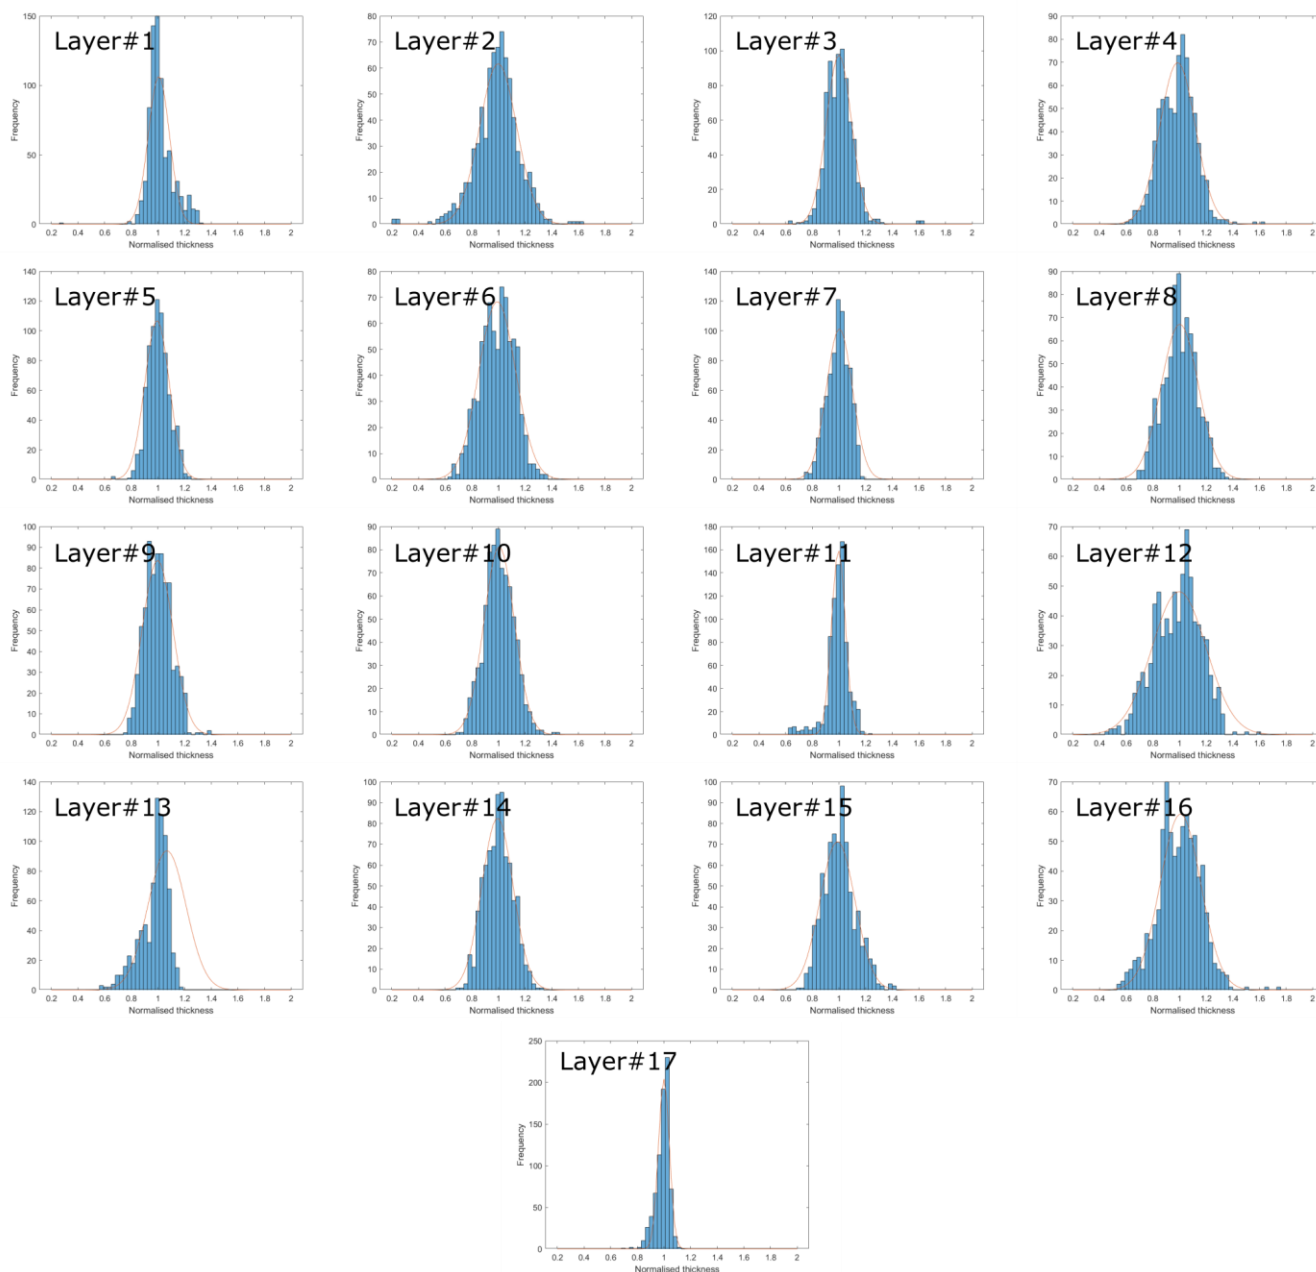

**Fig. S2** – Distributions of normalised thicknesses of each layer in the orange region of the elytra of *C. rajah* ( $N = 771$ ) with Gaussian fits. Layer#1 corresponds to the top layer and #17 to the deepest layer.

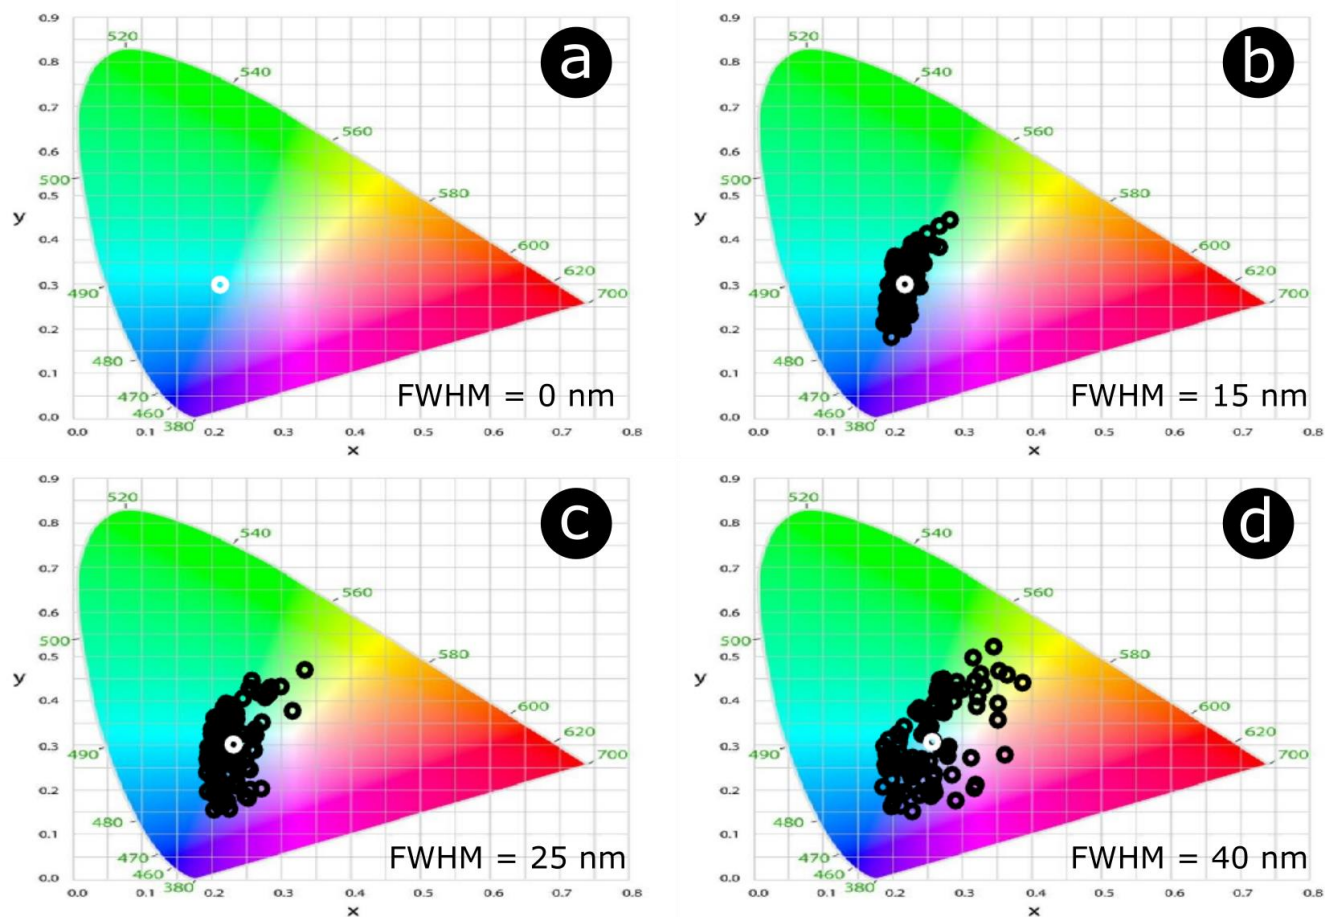

**Fig. S3** – The apparent constant and stable optical response of natural photonic structures arises from their high tolerance and resilience to positional defects arises. Representation on a 1931 CIE diagram (assuming a  $D_{65}$  illuminant) of the reflectance spectra calculated at normal incidence from a typical multilayer model in which positional disorder is progressively added (Fig. 12). The multilayer model is made out of 9 bilayers<sup>1</sup>, the high ( $n = 1.68 + 0.03i$ ) and low ( $n = 1.55 + 0.14i$ ) refractive index layers had thicknesses randomly selected following normal distributions with mean parameters equal to 92 nm and 60 nm, respectively. The FWHM of these normal distributions were varied from 0 nm to 40 nm (e,f). Fig. a-d correspond to FWHM = 0 nm, 15 nm, 25 nm and 40 nm, respectively.

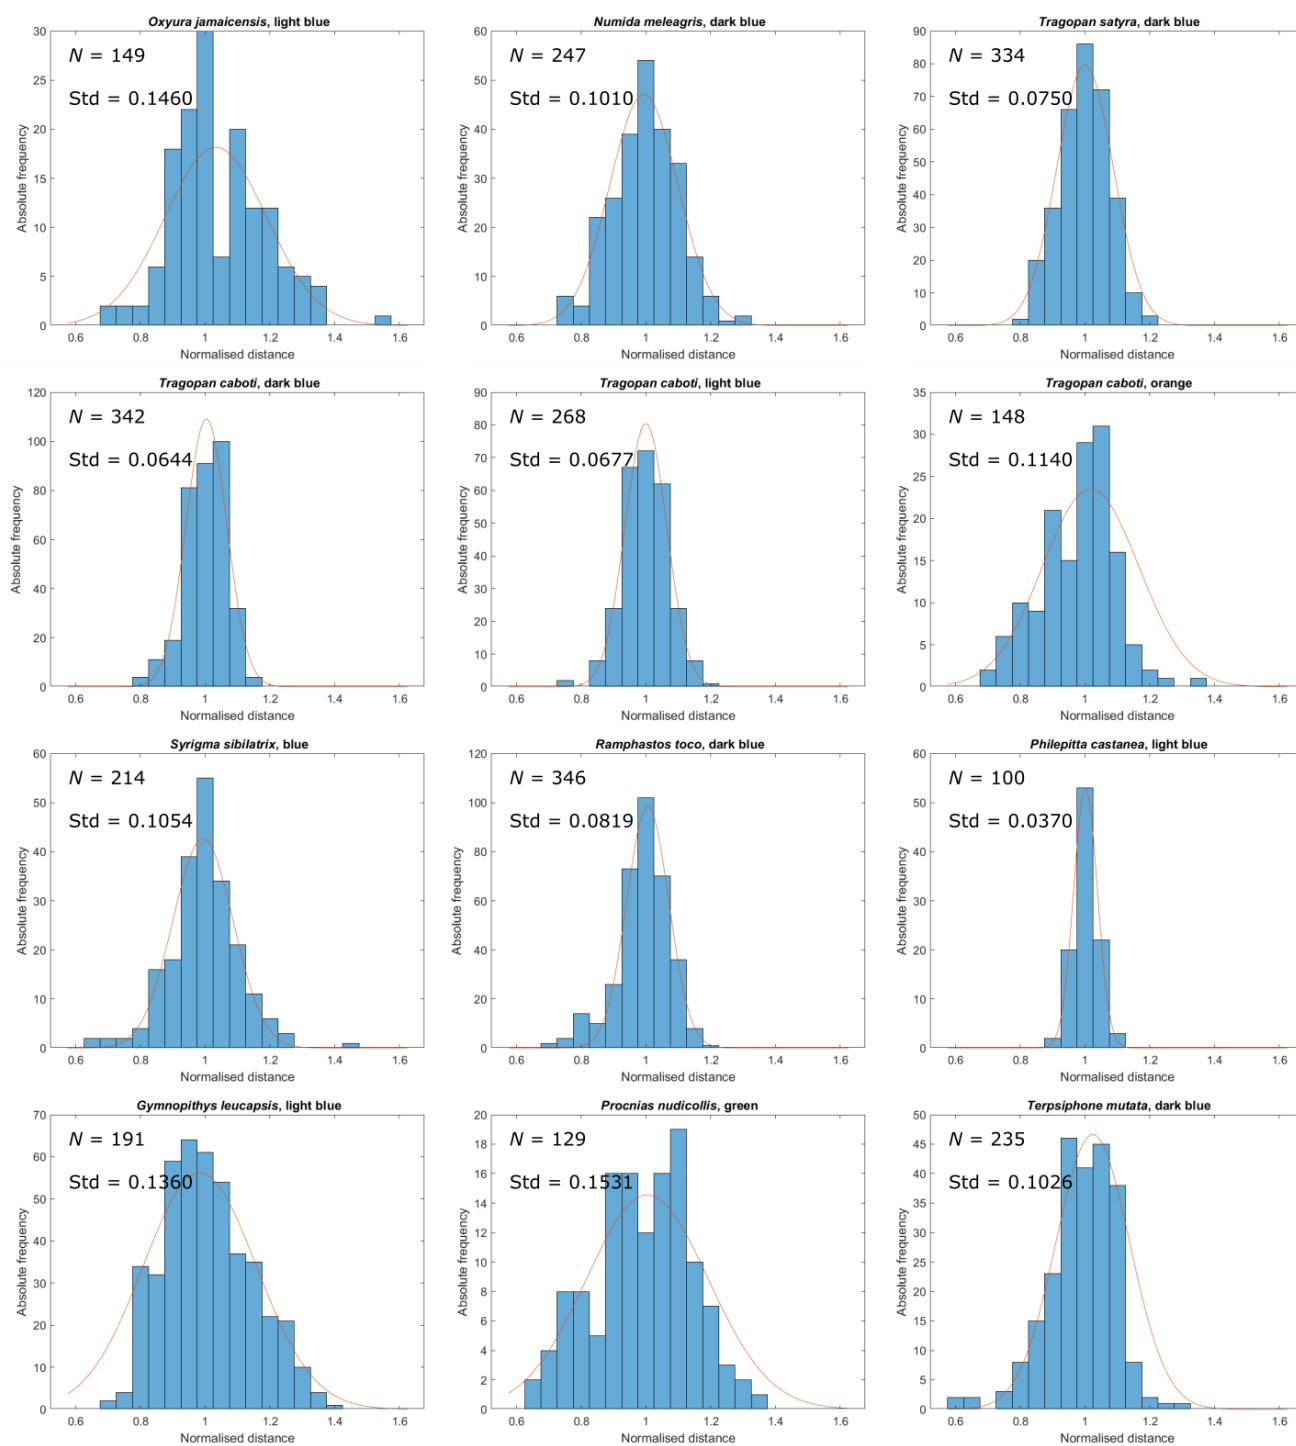

**Fig. S4** – Statistical analysis (histograms and Gaussian fits) of TEM images of cross-sections of parallel collagen fibres surrounded by mucopolysaccharide in a selection of avian dermides<sup>2</sup> (Fig. 13). The distributions of normalised distances to nearest neighbour allow to assess the extent of disorder in the photonic systems related to *Oxyura jamaicensis*, light blue; *Numida meleagris*, dark blue; *Tragopan satyra*, dark blue; *Tragopan caboti*, dark blue; *Tragopan caboti*, light blue; *Tragopan caboti*, orange; *Syrigma sibilatrix*, blue; *Ramphastos toco*, dark blue; *Philepitta castanea*, light blue; *Gymnophaps leucapsis*, light blue; *Procnias nudicollis*, green and *Terpsiphone mutata*, dark blue.

## Reference

- 1 J. A. Noyes, P. Vukusic, I. R. Hooper, *Opt. Express*, 2007, **15**, 4351-4358.
- 2 R. O. Prum, R. Torres, *J. Exp. Biol.*, 2003, **206**, 2409-2429.
